# Supplementary material for: Non-homologous end-joining-deficient filamentous fungal strains mitigate the impact of off-target mutations during the application of CRISPR/Cas9
Source: PubMed Central journal article supplement (PMC10470509; doi:10.1128/mbio.00668-23), 2023-07-24
Supplement: mbio.00668-23-s0001.pdf [file mbio.00668-23-s0001.pdf]

## Supplementary Material

# **Non-homologous End-Joining-deficient filamentous fungal strains mitigate the impact of off-target mutations during the application of CRISPR/Cas9**

**Sandra Garrigues<sup>a\*§</sup>, Mao Peng<sup>a§</sup>, Roland S. Kun<sup>a†</sup> and Ronald P. de Vries<sup>a#</sup>**

<sup>a</sup>Fungal Physiology, Westerdijk Fungal Biodiversity Institute & Fungal Molecular Physiology, Utrecht University, Uppsalalaan 8, 3584 CT Utrecht, The Netherlands

\*Present address: Department of Food Biotechnology, Instituto de Agroquímica y Tecnología de Alimentos (IATA), Consejo Superior de Investigaciones Científicas (CSIC), Paterna, Valencia, Spain.

†Present address: Leiden University, Institute of Biology Leiden, Microbial Sciences, Fungal Genetics and Biotechnology, Sylviusweg 72, 2333 BE, Leiden, The Netherlands

§ Authors contributed equally to this work and should be considered first co-authors. Author order is in order of increasing seniority.

#Corresponding author: Ronald P. de Vries. E-mail: [r.devries@knaw.wi.nl](mailto:r.devries@knaw.wi.nl)

**Running Title:** CRISPR/Cas9 risk assessment in fungi

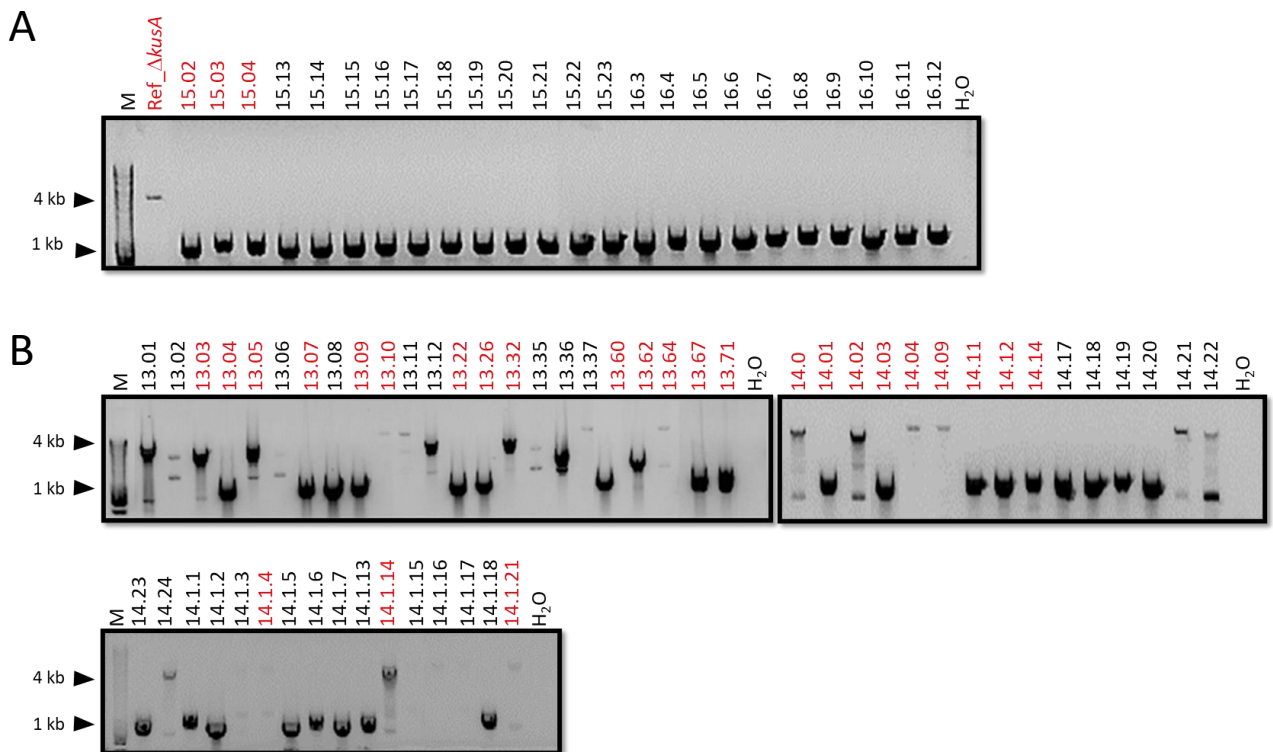

**Supp. Fig S1. Molecular characterization of the  $\Delta xInR$  mutants in the  $\Delta kusA$  (A) and wild-type (B) genetic backgrounds.** The 1 kb bands represent clean *xInR* deletions after HR in the presence of a dDNA. The 4 kb bands represent the presence of *xInR* gene compatible with NHEJ DNA repair mechanism. Note that all  $\Delta kusA$ -derived strains underwent HR, while wild type-derived strains underwent both HR and NHEJ. PCRs were carried out with oligos An-*xInR*\_5F and An-*xInR*\_3R (Supp. Table S1). Strains for which WGS was successful are represented in red. M: Molecular marker.

A

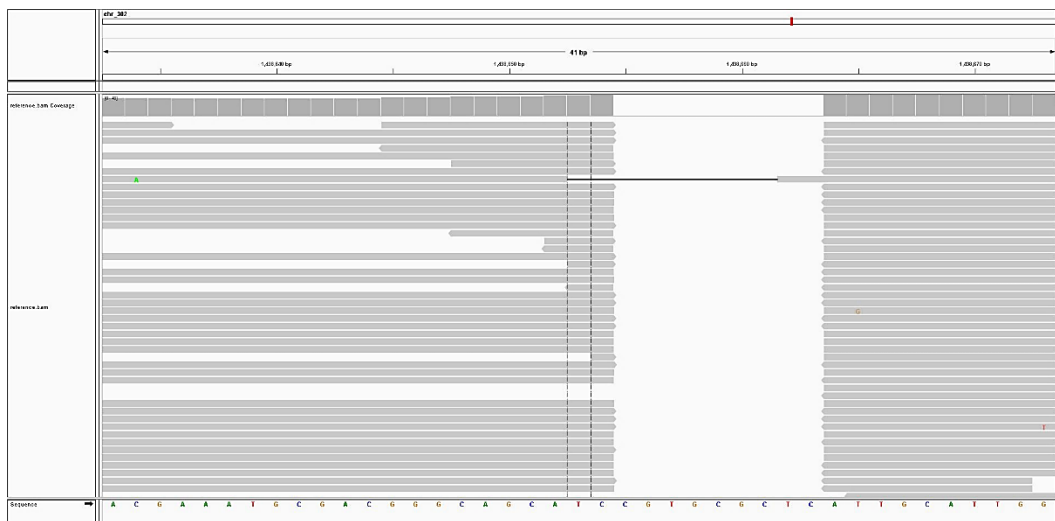

B

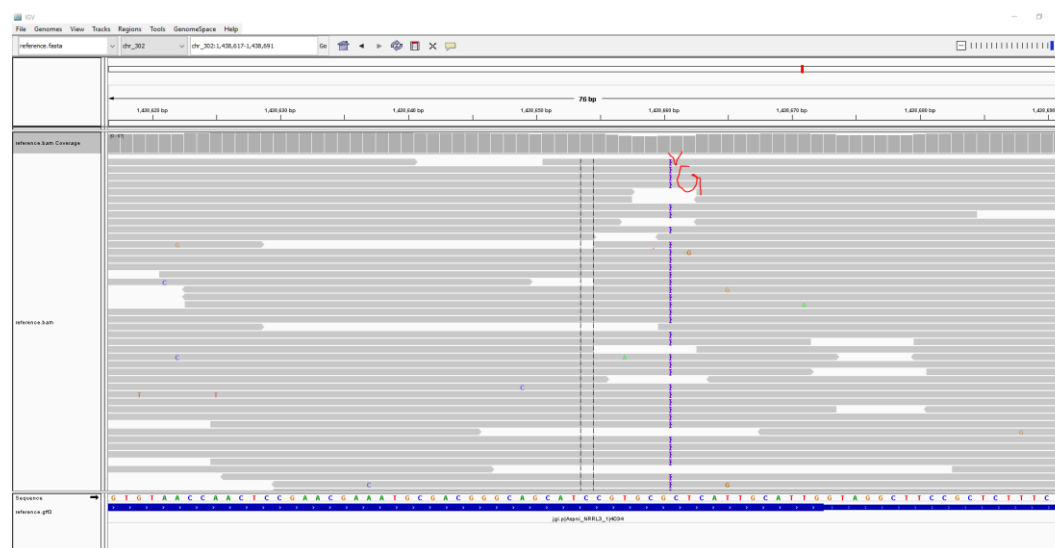

C

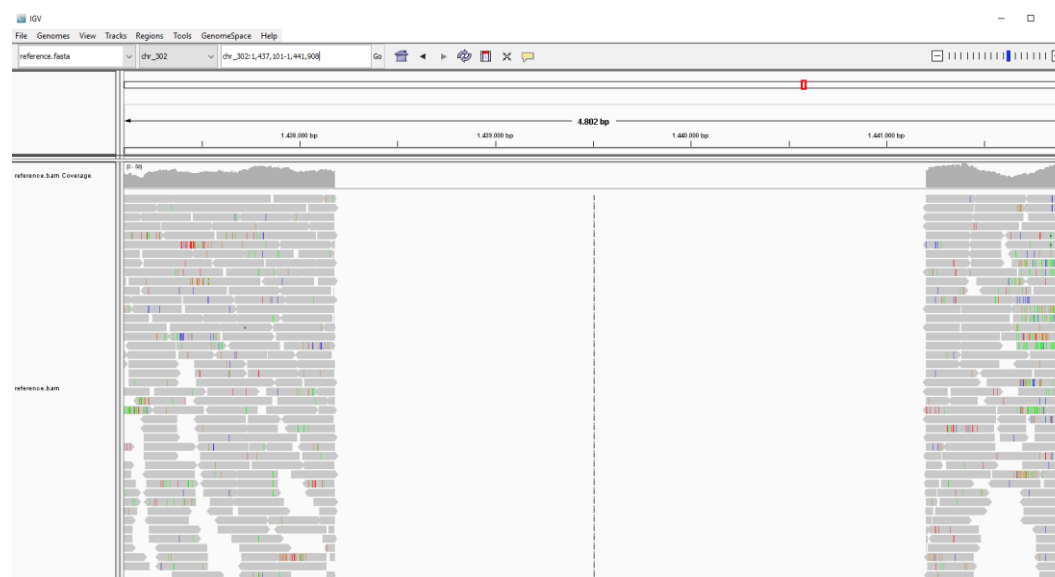

**Supp. Fig. S2. WGS analysis confirmed different repairing patterns between HDR and NHEJ after CRISPR/Cas9 in *A. niger* wild type strains. (A) a 9bp deletion was detected in NHEJ repairing sample-13.10; (B) an insertion of extra G was detected in NHEJ repairing sample-13.35, which cause a frameshift mutation; (C) a full deletion of *XlnR* gene was detected on HDR repairing sample 13.26. All three detected variants occurred at CRISPR/Cas9 cutting position (chr\_302: 1438653) resulted in dramatic function change of *XlnR* gene, which leads to a similar growth phenotype as showed in Fig. 1.**



**Suppl. Table S1. Average of mutations identified in the selected *A. niger* strains after WGS.**

Data show mean  $\pm$  Standard Deviation (SD) of the replicate samples. Number of replicates (n) are indicated in brackets

|                   | Transformation control (no Cas9) |                      | Transformation with Cas9, no gRNA |                      | Transformation with Cas9 and gRNA cassette |                        |                            |                      |
|-------------------|----------------------------------|----------------------|-----------------------------------|----------------------|--------------------------------------------|------------------------|----------------------------|----------------------|
|                   | wild type (n= 8)                 | $\Delta kusA$ (n= 4) | wild type (n= 11)                 | $\Delta kusA$ (n= 3) | Wild type (NHEJ) (n= 13)                   | Wild type (HR) (n= 13) | Wild type (NHEJ+HR) (n=26) | $\Delta kusA$ (n= 3) |
| <b>SNVs</b>       | 181 $\pm$ 78                     | 2 $\pm$ 0.8          | 183 $\pm$ 89                      | 7 $\pm$ 9            | 317 $\pm$ 159                              | 282 $\pm$ 149          | 300 $\pm$ 152              | 4 $\pm$ 1            |
| <b>Insertions</b> | 10 $\pm$ 3                       | 8 $\pm$ 2            | 9 $\pm$ 1                         | 8 $\pm$ 2            | 10 $\pm$ 4                                 | 10 $\pm$ 2             | 10 $\pm$ 3                 | 7 $\pm$ 2            |
| <b>Deletions</b>  | 6 $\pm$ 2                        | 2 $\pm$ 1            | 6 $\pm$ 3                         | 2 $\pm$ 1            | 7 $\pm$ 3                                  | 6 $\pm$ 3              | 7 $\pm$ 3                  | 3 $\pm$ 2            |

**Suppl. Table S2. Statistical analysis.** Significance was referred to  $p < 0.05$

| <b>Mutations</b>  | <b>Comparisons</b>                                    | <b>p value</b> | <b>Significance (*)</b> |
|-------------------|-------------------------------------------------------|----------------|-------------------------|
| <b>SNVs</b>       | wt no_cas9 VS. $\Delta kusA$ no_cas9                  | 0.001          | *                       |
|                   | wt no_cas9 VS. wt_cas9                                | 0.973          |                         |
|                   | $\Delta kusA$ _no_cas9 VS. $\Delta kusA$ _cas9        | 0.329          |                         |
|                   | wt_ $\Delta xlnR$ _NHEJ VS. wt_ $\Delta xlnR$ _HR     | 0.569          |                         |
|                   | wt_cas9 VS. $\Delta kusA$ _cas9                       | 0.006          | *                       |
|                   | wt_cas9 VS. wt_ $\Delta xlnR$ (NHEJ+HR)               | 0.023          | *                       |
|                   | $\Delta kusA$ _cas9 VS. $\Delta kusA$ _ $\Delta xlnR$ | 0.616          |                         |
|                   | wt_ $\Delta xlnR$ VS. $\Delta kusA$ _ $\Delta xlnR$   | 0.002          | *                       |
| <b>Insertions</b> | wt no_cas9 VS. $\Delta kusA$ no_cas9                  | 0.343          |                         |
|                   | wt no_cas9 VS. wt_cas9                                | 0.525          |                         |
|                   | $\Delta kusA$ _no_cas9 VS. $\Delta kusA$ _cas9        | 0.867          |                         |
|                   | wt_ $\Delta xlnR$ _NHEJ VS. wt_ $\Delta xlnR$ _HR     | 0.814          |                         |
|                   | wt_cas9 VS. $\Delta kusA$ _cas9                       | 0.528          |                         |
|                   | wt_cas9 VS. wt_ $\Delta xlnR$ (NHEJ+HR)               | 0.181          |                         |
|                   | $\Delta kusA$ _cas9 VS. $\Delta kusA$ _ $\Delta xlnR$ | 0.741          |                         |
|                   | wt_ $\Delta xlnR$ VS. $\Delta kusA$ _ $\Delta xlnR$   | 0.139          |                         |
| <b>Deletions</b>  | wt no_cas9 VS. $\Delta kusA$ no_cas9                  | 0.034          | *                       |
|                   | wt no_cas9 VS. wt_cas9                                | 0.935          |                         |
|                   | $\Delta kusA$ _no_cas9 VS. $\Delta kusA$ _cas9        | 0.945          |                         |
|                   | wt_ $\Delta xlnR$ _NHEJ VS. wt_ $\Delta xlnR$ _HR     | 0.446          |                         |
|                   | wt_cas9 VS. $\Delta kusA$ _cas9                       | 0.084          |                         |
|                   | wt_cas9 VS. wt_ $\Delta xlnR$ (NHEJ+HR)               | 0.444          |                         |
|                   | $\Delta kusA$ _cas9 VS. $\Delta kusA$ _ $\Delta xlnR$ | 0.829          |                         |
|                   | wt_ $\Delta xlnR$ VS. $\Delta kusA$ _ $\Delta xlnR$   | 0.037          | *                       |

**Suppl. Table S3. Primers used in this study**

| Primer ID                    | Use | TM (°C) | Sequence (5' → 3') <sup>a</sup>                        | Purpose <sup>b</sup> | Reference |
|------------------------------|-----|---------|--------------------------------------------------------|----------------------|-----------|
| P1-gRNA                      | F   | 57.3    | CAACCTCCAATCCAATTTGACTCCGCCGAA<br>CGTACTG              | gRNA                 | (38)      |
| P2-gRNA                      | R   | 54.1    | ACTACTCTACCACTATTTGAAAAGCAAAAA<br>AGGAAGGTACAAAAAAGC   | gRNA                 | (38)      |
| Fw-screen                    | F   | 47.9    | TTTTCTCTCCATTTACGC                                     | cse                  | (27)      |
| Rev-screen                   | R   | 53.1    | GGGGATCATAATAGTACTAGCCA                                | cse                  | (27)      |
| P3- <i>xlnR</i>              | R   | 53.2    | <b>CGGTCTCCTGGCGAGTATGCGACGAGCTT</b><br>ACTCGTTTCG     | gRNA                 | (23)      |
| P4- <i>xlnR</i>              | F   | 49.3    | <b>GCATACTCGCCAGGAGACCGGTTTTAGAG</b><br>CTAGAAATAGCAAG | gRNA                 | (23)      |
| An- <i>xlnR</i> _5F          | F   | 55.4    | GTGTGTGTGTGAGAGAGAAAGG                                 | RT (outside), csa    | (23)      |
| An- <i>xlnR</i> _5R          | R   | 55.1    | GCATCTCATCATCAGCCGTGTGAAAGTG<br>AGGTATTCAGACCG         | RT                   | (23)      |
| An- <i>xlnR</i> _3F          | F   | 57.6    | CGGTCTGAATACCTCACTTTCCACACGGCT<br>GATGATGAGATGC        | RT                   | (23)      |
| An- <i>xlnR</i> _3R          | R   | 57.2    | GACGAGAGGAGTTGGTAGCG                                   | RT (outside), csa    | (23)      |
| An- <i>xlnR</i> -NEST_5F     | F   | 55.7    | CTTTCTCGTGGGTTCTTCACC                                  | RT                   | (23)      |
| An- <i>xlnR</i> -NEST_3R     | R   | 56.6    | GGATGTAGTCGTCCAGGAGG                                   | RT                   | (23)      |
| P3- <i>gaaR</i>              | R   | 53.2    | <b>CGTCGCGTCCATGCCGAACCGACGAGCTT</b><br>ACTCGTTTCG     | gRNA                 | (56)      |
| P4- <i>gaaR</i>              | F   | 49.3    | <b>GGTTCGGCATGGACGCGAGGTTTTAGA</b><br>GCTAGAAATAGCAAG  | gRNA                 | (56)      |
| An- <i>gaaR</i> _5F          | F   | 56.5    | AAAGCAATCACGGCAACTGG                                   | RT (outside), csa    | (56)      |
| An- <i>gaaR</i> _5R          | R   | 55.2    | GGGTATCATCGCTCTAGTATTCAGTATGT<br>GGGAAGCGAATAGAGG      | RT                   | (56)      |
| An- <i>gaaR</i> _3F          | F   | 55.6    | CCTCTATTCGTTCCACATCAGTGAATAC<br>TAGAGCGATGATACCC       | RT                   | (56)      |
| An- <i>gaaR</i> _3R          | R   | 56.1    | TGTAGAATACTTGCCCATAGGTCG                               | RT (outside), csa    | (56)      |
| An- <i>gaaR</i> -<br>NEST_5F | F   | 55.9    | AGAATAGCTTCTTGCTAGACTGG                                | RT                   | (56)      |
| An- <i>gaaR</i> -<br>NEST_3R | R   | 56      | CGTGGACGCATTCTGTATG                                    | RT                   | (56)      |
| P3- <i>araR</i>              | R   | 53.2    | <b>CCCAGAAAGTCAGGGCACACGACGAGCT</b><br>TACTCGTTTCG     | gRNA                 | (56)      |
| P4- <i>araR</i>              | F   | 49.3    | <b>GTGTGCCCTGACTTTCTGGGTTTTAGAG</b><br>CTAGAAATAGCAAG  | gRNA                 | (56)      |
| An- <i>araR</i> _5F          | F   | 59.2    | GTCCGCAAGTTGTGTGGTGG                                   | RT (outside), csa    | (56)      |
| An- <i>araR</i> _5R          | R   | 56.2    | GCATCGGTGCTGTGAGAAACGGAATCGC<br>AGTCTGATGAAACG         | RT                   | (56)      |
| An- <i>araR</i> _3F          | F   | 56.7    | CGTTTCATCAGACTGCGATTCCGTTTCTCA<br>CAGCACCAGTGC         | RT                   | (56)      |
| An- <i>araR</i> _3R          | R   | 57.7    | AACCGAGAAGCCAGTTTCG                                    | RT (outside), csa    | (56)      |
| An- <i>araR</i> -<br>NEST_5F | F   | 57.8    | GAAGCGACCTCATAGCGACC                                   | RT                   | (56)      |
| An- <i>araR</i> -NEST-3R     | R   | 56.7    | ATGCCAGAAACATGCGATGC                                   | RT                   | (56)      |
| P3- <i>rhaR</i>              | R   | 53.2    | <b>CGCTGTGATCCCGTTCAGAGACGAGCTT</b><br>ACTCGTTTCG      | gRNA                 | (56)      |
| P4- <i>rhaR</i>              | F   | 49.3    | <b>TCTGGAACGGGATCACAGCGGTTTTAGA</b><br>GCTAGAAATAGCAAG | gRNA                 | (56)      |
| An- <i>rhaR</i> _5F          | F   | 56.5    | GTGCGGATCTCTTGATGCG                                    | RT (outside), csa    | (56)      |

|                        |   |      |                                                         |                   |                                     |
|------------------------|---|------|---------------------------------------------------------|-------------------|-------------------------------------|
| An-rhaR_5R             | R | 56.1 | GCGATAAACTGCCTCAAAGATGTTTTATC<br>GGGAGATAGACAGGTGC      | RT                | (56)                                |
| An-rhaR_3F             | F | 55.7 | GCACTGTCTATCTCCGATAAAACATCTT<br>TGAGGCAGTTTATCGC        | RT                | (56)                                |
| An-rhaR_3R             | R | 55.4 | CATCTTGACTTAGTGAACAGGAGC                                | RT (outside), csa | (56)                                |
| An-rhaR-<br>NEST_5F    | F | 55   | CAGTAGTTTAGCGGAGTGGG                                    | RT                | (56)                                |
| An-rhaR-<br>NEST_3R    | R | 55.7 | ACTCACCTCTTCTCATTCTCG                                   | RT                | (56)                                |
| P3-galX                | R | 53.2 | <b>ACGCGTTTGGTGGACACTAT</b> GACGAGCTT<br>ACTCGTTTCG     | gRNA              | (56)                                |
| P4-galX                | F | 49.3 | <b>ATAGTGCCACCAAACGCGT</b> GTTTTAGAG<br>CTAGAAATAGCAAG  | gRNA              | (56)                                |
| An-galX_5F             | F | 56.4 | CGTAGTTGAATGCGACCTGC                                    | RT                | (56)                                |
| An-galX_5R             | R | 56.7 | CCTTTCAGAGCTTTGAGATGGAAGAGGGA<br>AGAATGAGAAGTCAACCG     | RT                | (56)                                |
| An-galX_3F             | F | 55.7 | CGGTTGACTTCTATTCTCCCTCTCCATC<br>TCAAAGCTCTGAAAGG        | RT                | (56)                                |
| An-galX_3R             | R | 56.9 | AACAATTCAATTCGAGAAGCAGC                                 | RT (outside), csa | (56)                                |
| An-galX-NEST_5F        | F | 57.5 | GCTCAAAGTGGGACAATGC                                     | RT (outside), csa | (56)                                |
| An-galX-NEST_3R        | R | 56.4 | CCAGTGCATCAGAAACACG                                     | RT                | (56)                                |
| P3-clrB                | R | 53.2 | <b>TCCTTTCTTCAGACCTGAGC</b> GACGAGCTTA<br>CTCGTTTCG     | gRNA              | (24)                                |
| P4-clrB                | F | 49.3 | <b>GCTCAGGTCTGAAGAAAGGAG</b> TTTTAGA<br>GCTAGAAATAGCAAG | gRNA              | (24)                                |
| An-<br>clrB_5F/NEST_5F | F | 56.7 | ATCACACAACCCTTCTCGTACC                                  | RT                | (24)                                |
| An-clrB_5R             | R | 56.4 | CGATAGCGAATCCTAGCAGTTGCTGGAGT<br>TTTTGTTTGACGG          | RT                | (24)                                |
| An-clrB_3F             | F | 55.5 | ACTGCTAGGATTCGCTATCGCTGTACTTAC<br>AGGGTGCAGC            | RT                | (24)                                |
| An-<br>clrB_3R/NEST_3R | R | 55   | GGATGGATCGTCTTAGGATGC                                   | RT                | (24)                                |
| An-clrB_F              | F | 57.5 | GTGTGACTGTCCCCTTCTCC                                    | csa               | (24)                                |
| An-clrB_R              | R | 56.4 | TTCCTTATGTAGCCCCAGAGC                                   | csa               | (24)                                |
| P3-amyR                | R | 53.2 | <b>TGCGATAAGTGTGACGCCT</b> GACGAGCTT<br>ACTCGTTTCG      | gRNA              | (Kun <i>et al</i> ,<br>unpublished) |
| P4-amyR                | F | 49.3 | <b>AGGCGTCGACACTTATCGCAG</b> TTTTAGAG<br>CTAGAAATAGCAAG | gRNA              | (Kun <i>et al</i> ,<br>unpublished) |
| An-amyR_5F             | F | 57.1 | TGGGATGTTACCAGTGTACG                                    | RT (outside), csa | (Kun <i>et al</i> ,<br>unpublished) |
| An-amyR_5R             | R | 57.9 | CGATAGCGAATCCTAGCAGTGGGAGACA<br>AGTGTGACTCC             | RT                | (Kun <i>et al</i> ,<br>unpublished) |
| An-amyR_3F             | F | 55.8 | ACTGCTAGGATTCGCTATCGCAACTACGA<br>CGATGACGATGC           | RT                | (Kun <i>et al</i> ,<br>unpublished) |
| An-amyR_3R             | R | 57.8 | CACCGTGACCCAGAGAAAGG                                    | RT (outside), csa | (Kun <i>et al</i> ,<br>unpublished) |
| An-amyR-<br>NEST_5F    | F | 57.3 | GAGCCTCAGACTCTGTGAGC                                    | RT                | (Kun <i>et al</i> ,<br>unpublished) |
| An-amyR-<br>NEST_3R    | R | 55.4 | TCCACCACCATCAAATCACC                                    | RT                | (Kun <i>et al</i> ,<br>unpublished) |
| P3-inuR                | R | 53.2 | <b>ACGTCTTCTTCGAGCTAAG</b> ACGAGCTT<br>ACTCGTTTCG       | gRNA              | (Kun <i>et al</i> ,<br>unpublished) |
| P4-inuR                | F | 49.3 | <b>TTAGCTCGAGAAGAAGACGT</b> GTTTTAGA<br>GCTAGAAATAGCAAG | gRNA              | (Kun <i>et al</i> ,<br>unpublished) |
| An-inuR_5F             | F | 57   | TCGGAGGAGATACGCAAAGC                                    | RT (outside), csa | (Kun <i>et al</i> ,<br>unpublished) |



|                             |   |      |                                                        |                          |                                     |
|-----------------------------|---|------|--------------------------------------------------------|--------------------------|-------------------------------------|
| An- <i>inuR</i> _5R         | R | 55.7 | CGATAGCGAATCCTAGCAGTCTCACGAGT<br>CATAAGCATTGTCCG       | RT                       | (Kun <i>et al</i> ,<br>unpublished) |
| An- <i>inuR</i> _3F         | F | 55.7 | ACTGCTAGGATTCGCTATCGTGGCGTTCT<br>GGTTTTATCACG          | RT                       | (Kun <i>et al</i> ,<br>unpublished) |
| An- <i>inuR</i> _3R         | R | 57.7 | ATTGACGGGCATGAGTGTCC                                   | RT (outside), <i>csa</i> | (Kun <i>et al</i> ,<br>unpublished) |
| An- <i>inuR</i> -NEST_5F    | F | 57.4 | TAAGAACAACGACCCCATCGC                                  | RT                       | (Kun <i>et al</i> ,<br>unpublished) |
| An- <i>inuR</i> -NEST_3R    | R | 58.5 | AAGGGAAACCGCCAATCAGC                                   | RT                       | (Kun <i>et al</i> ,<br>unpublished) |
| P3- <i>clrA</i>             | R | 53.2 | <b>TGGAAGAATTCGATGACAGG</b> GACGAGCT<br>TACTCGTTTCG    | gRNA                     | (24)                                |
| P4- <i>clrA</i>             | F | 49.3 | <b>CCTGTATCGAATCTTCCA</b> GTTTTAGAGC<br>TAGAAATAGCAAG  | gRNA                     | (24)                                |
| An- <i>clrA</i> _5F/NEST_5F | F | 55.1 | TCAGCGAAACAGTAAGAACG                                   | RT                       | (24)                                |
| An- <i>clrA</i> _5R         | R | 54.9 | CGATAGCGAATCCTAGCAGTGTGTTGTG<br>TTCAAGGGTGC            | RT                       | (24)                                |
| An- <i>clrA</i> _3F         | F | 55.6 | ACTGCTAGGATTCGCTATCGCATCATACGC<br>ATCTTGTCAGTCC        | RT                       | (24)                                |
| An- <i>clrA</i> _3R/NEST_3R | R | 56.4 | GGCAGTATTAACCAGGCTTGC                                  | RT                       | (24)                                |
| An- <i>clrA</i> _F          | F | 56.9 | TGTCAGTCTCGCCAACATACC                                  | <i>csa</i>               | (24)                                |
| An- <i>clrA</i> _R          | R | 55.8 | AGTGCAAGATGCTGTCTTTTTGG                                | <i>csa</i>               | (24)                                |
| P3- <i>creA</i>             | R | 53.2 | <b>CGGTGAGTGAGCGGGAGTC</b> GGACGAGCT<br>TACTCGTTTCG    | gRNA                     | (Kun <i>et al</i> ,<br>unpublished) |
| P4- <i>creA</i>             | F | 49.3 | <b>CGACTCCCGTCACTCACC</b> GGTTTTAGAGC<br>TAGAAATAGCAAG | gRNA                     | (Kun <i>et al</i> ,<br>unpublished) |
| An- <i>creA</i> _5F         | F | 57   | ACTTCTCCAGACCACACAGC                                   | RT (outside), <i>csa</i> | (Kun <i>et al</i> ,<br>unpublished) |
| An- <i>creA</i> _5R         | R | 55   | CGATAGCGAATCCTAGCAGTCGACGAGG<br>GTAAAAAGGTAGG          | RT                       | (Kun <i>et al</i> ,<br>unpublished) |
| An- <i>creA</i> _3F         | F | 56.6 | ACTGCTAGGATTCGCTATCGCGAACATTCT<br>TCAGCCACACG          | RT                       | (Kun <i>et al</i> ,<br>unpublished) |
| An- <i>creA</i> _3R         | R | 55   | TCATTCTGACTGACGCAATCC                                  | RT (outside), <i>csa</i> | (Kun <i>et al</i> ,<br>unpublished) |
| An- <i>creA</i> -NEST_5F    | F | 56.6 | TAGGCAACTGATGGAGACACC                                  | RT                       | (Kun <i>et al</i> ,<br>unpublished) |
| An- <i>creA</i> -NEST_3R    | R | 56.9 | GACGTTTGGGGTAAACAAAGCC                                 | RT                       | (Kun <i>et al</i> ,<br>unpublished) |

F: forward, R: reverse, TM: temperature of melting

<sup>a</sup>The gRNA sequence is highlighted in bold

<sup>b</sup>gRNA single guide, RNA RT repair template, BC with barcodes, TR traceability, cse colony screening for *E. coli*, *csa* colony screening for *A. niger*
